# Supplementary material for: From transcriptome to biological function: environmental stress in an ectothermic vertebrate, the coral reef fish Pomacentrus moluccensis
Source: PubMed Central journal article supplement (PMC2222645; doi:10.1186/1471-2164-8-358), 2007-10-05
Supplement: 1471-2164-8-358-S1.pdf [file 1471-2164-8-358-S1.pdf]

**Additional File 1** Changes in mRNA levels in *Pomacentrus moluccensis* exposed to three-hour stress treatments compared to *P. moluccensis* kept at ambient conditions (28°C, 100% air saturation). GenBank accession numbers refer to the *Danio rerio* clones represented on the microarray. Statistical significance was determined using Bayesian analysis of the expression response across biological replicates (p-values are FDR-corrected). Negative values of fold change indicate down-regulation of gene in stressed *P. moluccensis*, while positive values indicate up-regulation. Only genes with FDR-corrected p-values <0.1 and genes with greater two-fold expression changes are reported here.

| Rank                                   | GenBank Accession <i>D. rerio</i> clone | UniGene ID | Gene Symbol | Putative Identification                         | Function                                    | Fold Change | p      |
|----------------------------------------|-----------------------------------------|------------|-------------|-------------------------------------------------|---------------------------------------------|-------------|--------|
| <b>Cold shock (22°C)</b>               |                                         |            |             |                                                 |                                             |             |        |
| 1                                      | BI533884                                | Dr.17570   | mknk2       | MAP kinase-interacting kinase 2                 | Response to stress; Protein kinase cascade  | +2.20       | 0.1667 |
| 16                                     | AI601458                                | Dr.17520   | ube2h       | Ubiquitin-conjugating enzyme E2H                | Protein catabolism; Response to heat        | +2.13       | 0.9994 |
| <b>Moderate heat shock (31°C)</b>      |                                         |            |             |                                                 |                                             |             |        |
| 1                                      | AW134054                                | Dr.36134   | plec1       | Plectin 1                                       | Structural constituent of cytoskeleton      | +1.75       | 0.0015 |
| 9                                      | AI601458                                | Dr.17520   | ube2h       | ubiquitin-conjugating enzyme E2H                | Protein catabolism; Response to heat        | +2.44       | 0.2658 |
| 72                                     | BI710730                                | Dr.31497   | ncl         | Nucleolin                                       | RNA binding                                 | +2.78       | 0.5414 |
| 170                                    | AW116649                                | Dr.1099    | prkcsh      | Protein kinase C substrate 80K-H                | Kinase activity; Calcium ion binding        | -2.05       | 0.5604 |
| 172                                    | AI476925                                | Dr.1218    | EXOSC2      | Exosome component 2                             | Exonuclease activity; rRNA processing       | +2.15       | 0.5604 |
| 186                                    | AB026980                                | Dr.8092    | odz4        | odd Oz/ten-m homolog 4                          | MAPKKK cascade; immune response             | +2.30       | 0.5604 |
| 315                                    | BI673605                                | Dr.6875    | TRIAD3      | TRIAD3 protein                                  | Protein binding; Ubiquitin cycle            | +2.57       | 0.6326 |
| 353                                    | BI865754                                | Dr.59783   | hmg4        | High mobility group protein 4                   | DNA-dependent regulation of transcription   | +2.28       | 0.6608 |
| 464                                    | AW826769                                | Dr.32001   | ptk9l       | Protein tyrosine kinase 9-like                  | Cytoskeleton; Actin binding                 | +2.05       | 0.7174 |
| 1039                                   | AB057355                                | Dr.12576   | ednra       | Endothelin receptor type A                      | Signal Transduction                         | +2.14       | 0.7895 |
| <b>Severe heat shock (34°C)</b>        |                                         |            |             |                                                 |                                             |             |        |
| 1                                      | AF387900                                | Dr.6509    | pdip5       | Protein disulfide isomerase-related protein P5  | Protein folding                             | +4.89       | 0.0000 |
| 2                                      | AI959074                                | Dr.18762   | rhoA        | Ras-like protein RhoA                           | Regulation of cell cycle                    | -1.60       | 0.0006 |
| 3                                      | BG729495                                | Dr.31651   | ZCCHC11     | Zinc finger CCHC domain containing 11 isoform b | DNA replication, recombination, and repair  | +1.99       | 0.0039 |
| 4                                      | AW175080                                | Dr.8390    | SC4MOL      | Sterol-C4-methyl oxidase-like                   | Catalytic activity; Sterol biosynthesis     | -1.66       | 0.0624 |
| 5                                      | AW279775                                | Dr.3130    | rgs4        | Regulator of G-protein signalling 4             | Signal transducer activity                  | -1.30       | 0.0624 |
| 6                                      | BI876768                                | Dr.43918   | znf395      | Zinc finger protein 395                         | DNA-dependent regulation of transcription   | -1.52       | 0.0624 |
| 197                                    | AF246169                                | Dr.30471   | tcrα        | T-cell receptor alpha variable region           | T-cell receptor complex                     | -2.25       | 0.9998 |
| 845                                    | BE557072                                | Dr.10066   | birc6       | Baculoviral IAP repeat-containing 6             | Ubiquitin conjugating enzyme activity       | -2.49       | 0.9998 |
| <b>Hypoxia (23-36% air saturation)</b> |                                         |            |             |                                                 |                                             |             |        |
| 1                                      | AI558655                                | Dr.36283   | acin1a      | Apoptotic chromatin condensation inducer 1a     | DNA binding; Apoptosis                      | +2.47       | 0.0008 |
| 2                                      | AI522803                                | Dr.34133   | Ela2        | Elastase 2                                      | Proteolysis and peptidolysis                | +2.90       | 0.0011 |
| 3                                      | AI558632                                | Dr.33926   | ElaA        | Elastase A                                      | Proteolysis and peptidolysis                | +2.99       | 0.0085 |
| 5                                      | BI476356                                | Dr.16450   | CHST2       | Carbohydrate sulfotransferase 2                 | Inflammatory response; Sulfur metabolism    | +1.32       | 0.0085 |
| 7                                      | BM183382                                | Dr.16654   | AVD         | Avidin                                          | Biotin binding                              | +2.25       | 0.0176 |
| 8                                      | AI496860                                | Dr.31546   | Cpa2        | Carboxypeptidase A2                             | Proteolysis and peptidolysis                | +2.84       | 0.0258 |
| 9                                      | AF025305                                | Dr.1109    | bactin2     | Actin, cytoplasmic 1 (Beta-actin)               | Structural constituent of cytoskeleton      | +1.60       | 0.0647 |
| 10                                     | BM103972                                | Dr.2437    | amy2a       | Amylase-3 protein                               | Carbohydrate metabolism; Hydrolase activity | +2.76       | 0.0651 |
| 16                                     | AW777717                                | Dr.2317    | NKX2-8      | NK2 transcription factor related, locus 8       | Transcription factor activity               | -2.19       | 0.2928 |
| 112                                    | AF052252                                | Dr.21004   | fdk9        | Fork head domain protein FKD9                   | Transcription factor activity               | -2.38       | 0.6438 |
| 332                                    | AB026980                                | Dr.8092    | odz4        | Odd Oz/ten-m homolog 4                          | MAPKKK cascade; immune response             | -2.06       | 0.9476 |
| 578                                    | BI710730                                | Dr.31497   | ncl         | Nucleolin                                       | RNA binding                                 | -2.01       | 0.9998 |
