# Supplementary material for: From transcriptome to biological function: environmental stress in an ectothermic vertebrate, the coral reef fish Pomacentrus moluccensis
Source: PubMed Central journal article supplement (PMC2222645; doi:10.1186/1471-2164-8-358), 2007-10-05
Supplement: 1471-2164-8-358-S2.pdf [file 1471-2164-8-358-S2.pdf]

**Additional File 2** Changes in mRNA expression levels in heat-stressed *Pomacentrus moluccensis*, exposed to elevated temperatures (31°C) for five days compared to *P. moluccensis* kept at ambient temperature (28°C) for five days. Only genes for which information regarding gene function is currently available are reported here. Where multiple functions have been identified for a gene, the gene function most relevant in the context of this study is reported. GenBank accession numbers refer to the *Danio rerio* clones represented on the microarray. Genes were ranked according to statistical significance as determined by Bayesian analysis of the expression response across biological replicates. Negative values of fold change indicate down-regulation of gene in heat-stressed *P. moluccensis*, while positive values indicate up-regulation (p-values are FDR-corrected).

| Rank                       | GenBank Accession<br><i>D.rerio</i> clone | UniGene ID | Gene Symbol             | Putative Identification                                | Function                                  | Fold Change | P      |
|----------------------------|-------------------------------------------|------------|-------------------------|--------------------------------------------------------|-------------------------------------------|-------------|--------|
| Cell Adhesion              |                                           |            |                         |                                                        |                                           |             |        |
| 21                         | AF081128                                  | Dr.28760   | fn1                     | Fibronectin 1                                          | Protein binding; Cell adhesion            | +2.09       | 0.0227 |
| 45                         | AI641045                                  | Dr.9212    | <sup>DKEYP-18C4.2</sup> | Podocalyxin precursor                                  | Negative regulation of cell adhesion      | +1.93       | 0.0386 |
| 72                         | AF081128                                  | Dr.28760   | fn1                     | Fibronectin 1                                          | Protein binding; Cell adhesion            | +1.90       | 0.0414 |
| 81                         | BI882735                                  |            | nrxn3                   | Neurexin 3-alpha                                       | Cell adhesion                             | +1.28       | 0.0428 |
| 161                        | BI846718                                  |            | papln                   | Papilin, proteoglycan-like sulfated glycoprotein       | Cell adhesion; Protein binding            | +1.61       | 0.0614 |
| 203                        | BI891338                                  |            |                         | Protocadherin 1 isoform 1 precursor                    | Cell adhesion; Calcium ion binding        | +1.56       | 0.0737 |
| 211                        | AW019629                                  | Dr.6507    | eva1                    | Epithelial V-like antigen 1                            | Cell adhesion; Protein binding            | +1.35       | 0.0752 |
| 255                        | AI384393                                  | Dr.418     | pcdh2g9                 | Protocadherin 2 gamma 9                                | Homophilic cell adhesion                  | -1.26       | 0.0907 |
| Cell Cycle and Cell Growth |                                           |            |                         |                                                        |                                           |             |        |
| 26                         | BG308696                                  | Dr.11045   | GRIM19                  | Cell death-regulatory protein GRIM19                   | Apoptosis                                 | +1.75       | 0.0227 |
| 33                         | BG308520                                  | Dr.33755   | TP53INP1                | Tumor protein p53 inducible nuclear protein 1          | Apoptosis                                 | +1.54       | 0.0300 |
| 61                         | BI672829                                  | Dr.13625   | slah21                  | Seven in absentia homolog 2 ( <i>Drosophila</i> )-like | Mitotic checkpoint                        | +1.61       | 0.0392 |
| 70                         | AF229449                                  | Dr.8287    | jag2                    | Jagged 2 isoform 1                                     | Cell cycle; Cell communication            | +1.36       | 0.0392 |
| 100                        | BI472637                                  | Dr.15050   | SEPT3                   | Septin 3                                               | Cell cycle; Cytokinesis                   | +1.35       | 0.0504 |
| 144                        | AI959372                                  | Dr.1212    | ccng1                   | Cyclin G1                                              | Cell cycle checkpoint                     | +1.34       | 0.0614 |
| 173                        | AW154091                                  | Dr.33730   | cdca3                   | Cell division cycle associated 3 isoform 1             | Cell division                             | +1.35       | 0.0667 |
| 205                        | BI672089                                  | Dr.14498   | TXNL4B                  | Thioredoxin-like 4B                                    | Mitosis                                   | +1.99       | 0.0745 |
| 285                        | BG727086                                  | Dr.41921   | TGFB1                   | Transforming growth factor beta-1-binding protein      | Cell Growth; Inflammatory response        | +1.33       | 0.0960 |
| 288                        | BI672476                                  | Dr.14472   |                         | Amyloid-like protein 2 precursor                       | Apoptosis; Cell adhesion; Heparin binding | +1.29       | 0.0965 |
| 307                        | BI672424                                  | Dr.14459   | bax                     | BCL2-associated X protein                              | Regulation of apoptosis; Cell cycle       | +1.38       | 0.0975 |
| Cytoskeleton               |                                           |            |                         |                                                        |                                           |             |        |
| 46                         | BM172691                                  | Dr.14192   | DNAH11                  | Dynein, axonemal, heavy polypeptide 11                 | Microtubule motor activity                | +1.53       | 0.0386 |
| 57                         | BM025904                                  | Dr.6441    | DNAH11                  | Dynein, axonemal, heavy polypeptide 11                 | Microtubule motor activity                | +1.22       | 0.0392 |
| 126                        | AW116733                                  | Dr.19450   | SPTB                    | Spectrin                                               | Structural constituent of cytoskeleton    | +1.63       | 0.0586 |
| 147                        | BI979131                                  | Dr.13282   | DNAL4                   | Dynein, axonemal, light polypeptide 4                  | Microtubule-based movement                | +1.54       | 0.0614 |
| 148                        | AI584969                                  | Dr.28264   | gas8                    | Growth arrest-specific 8                               | Cytoskeleton                              | +1.31       | 0.0614 |
| 197                        | BI864873                                  | Dr.6173    | tubb2                   | Tubulin beta-2                                         | Structural constituent of cytoskeleton    | +1.50       | 0.0710 |
| 231                        | BI889708                                  | Dr.1964    | PTPN13                  | Protein tyrosine phosphatase, non-receptor type 13     | Cytoskeleton; Protein binding             | +1.28       | 0.0804 |
| 239                        | AA658732                                  | Dr.867     | wdr1                    | WD repeat domain 1                                     | Cytoskeleton                              | +1.36       | 0.0830 |
| 244                        | BI671622                                  |            | filamin 2               | Gamma Filamin                                          | Cytoskeleton; Actin binding               | +1.28       | 0.0887 |

Table 1 cont.

| Rank               | GenBank Accession<br><i>D. rerio</i> clone | UniGene ID | Gene Symbol | Putative Identification                                | Function                                    | Fold Change | p      |
|--------------------|--------------------------------------------|------------|-------------|--------------------------------------------------------|---------------------------------------------|-------------|--------|
| Metabolism         |                                            |            |             |                                                        |                                             |             |        |
| 35                 | BF156211                                   | Dr.11446   | ACAD        | Acyl-CoA dehydrogenase                                 | Electron transport; Metabolism              | -1.25       | 0.0311 |
| 48                 | BI892323                                   | Dr.30594   | dgat2l      | Diacylglycerol acyltransferase 2-like                  | Lipid metabolism                            | +1.41       | 0.0386 |
| 59                 | AA494790                                   | Dr.396     | dcxr        | Dicarbonyl/L-xylulose reductase                        | Glucose metabolism                          | +1.39       | 0.0392 |
| 65                 | AW305632                                   | Dr.36924   | HADH2       | 3-hydroxyacyl-CoA dehydrogenase type II                | Oxidoreductase activity; Lipid metabolism   | +1.54       | 0.0392 |
| 78                 | BI710519                                   | Dr.29442   | crabp2      | Cellular retinoic acid binding protein 2               | Lipid binding                               | +1.22       | 0.0418 |
| 103                | BM104068                                   |            | wac         | WW domain containing adaptor with coiled-coil          | Glucan 1,4-alpha-glucosidase activity       | +1.26       | 0.0527 |
| 107                | AI545065                                   | Dr.7466    | ak3l1       | Adenylate kinase 3-like 1                              | ATP binding; Adenylate kinase activity      | +1.52       | 0.0558 |
| 118                | AW281616                                   | Dr.12080   | Glb1        | Beta-galactosidase                                     | Carbohydrate metabolism                     | +1.30       | 0.0586 |
| 127                | AW116000                                   | Dr.7640    | setd8       | SET domain containing (lysine methyltransferase) 8     | Methyltransferase activity                  | +1.44       | 0.0586 |
| 186                | AI957831                                   | Dr.15140   | mettl6      | Methyltransferase-like 6                               | Methyltransferase activity                  | +1.91       | 0.0698 |
| 188                | BM103899                                   | Dr.12654   | elovl6l     | ELOVL family member 6                                  | Fatty acid elongation                       | +1.33       | 0.0698 |
| 219                | BM024412                                   | Dr.2359    | nvl         | Nuclear VCP-like                                       | ATP binding                                 | +1.53       | 0.0792 |
| 221                | BI885898                                   |            | dnmt        | DNA (cytosine-5-)-methyltransferase 3                  | Methyltransferase activity; DNA methylation | +1.33       | 0.0792 |
| 234                | AW280062                                   | Dr.9165    | ZDHH9       | Zinc finger, DHHC-type containing 9                    | Metal ion binding; Transferase activity     | -1.23       | 0.0821 |
| 250                | BI882221                                   | Dr.33925   | rdh12l      | Odd Oz/ten-m homolog 3; retinol dehydrogenase 12, like | Oxidoreductase activity                     | +1.46       | 0.0900 |
| 278                | AW115782                                   | Dr.6619    | pgd         | Phosphogluconate hydrogenase                           | Oxidoreductase; Pentose-phosphate shunt     | -1.26       | 0.0959 |
| 281                | AW232289                                   | Dr.1041    | fuca1       | Fucosidase, alpha-L- 1, tissue                         | Carbohydrate metabolism                     | +1.47       | 0.0959 |
| 286                | BM070575                                   | Dr.11133   | dpysl5b     | Dihydropyrimidinase-like 5b                            | Hydrolase activity                          | +1.26       | 0.0960 |
| 300                | AW232323                                   | Dr.30175   | AGPAT3      | 1-acylglycerol-3-phosphate O-acyltransferase 3         | Acyltransferase activity                    | +1.48       | 0.0968 |
| Protein Processing |                                            |            |             |                                                        |                                             |             |        |
| 2                  | AW116649                                   | Dr.1099    | prkcsh      | Protein kinase C substrate 80K-H                       | Protein kinase cascade                      | +3.87       | 0.0131 |
| 18                 | BM102551                                   | Dr.17149   | PAPPA       | Pregnancy-associated plasma protein A                  | Proteolysis                                 | +2.06       | 0.0195 |
| 36                 | BI672058                                   | Dr.2642    | ntf2        | Nuclear transport factor 2                             | Protein transport                           | +1.68       | 0.0317 |
| 74                 | AF130460                                   | Dr.8275    | trpc4apb    | Transient receptor potential cation channel            | Protein transport                           | +1.49       | 0.0414 |
| 86                 | BG306270                                   | Dr.15263   | snrk        | SNF1-related kinase                                    | Protein kinase activity                     | +1.57       | 0.0441 |
| 91                 | AW170941                                   | Dr.7993    | USP29       | Ubiquitin specific peptidase 29                        | Ubiquitin-dependent protein catabolism      | -1.25       | 0.0464 |
| 102                | BI704448                                   | Dr.17040   | chm         | Rab escort protein 1; choroideremia                    | Intracellular protein transport             | +2.31       | 0.0509 |
| 108                | BM101665                                   | Dr.9559    | ctss        | Cathepsin S                                            | Proteolysis                                 | -1.39       | 0.0563 |
| 113                | BI886677                                   | Dr.18008   | RBM12       | RNA binding motif protein 12                           | Protein binding                             | -1.17       | 0.0583 |
| 130                | BI979883                                   | Dr.31059   | psmc3       | Proteasome (prosome, macropain) 26S subunit, ATPase, 3 | Ubiquitin-dependent protein catabolism      | -1.34       | 0.0586 |
| 132                | BI891871                                   | Dr.3615    | csnk1d      | Casein kinase 1, delta                                 | Protein serine/threonine kinase activity    | +1.34       | 0.0587 |
| 140                | AW134164                                   | Dr.20940   | fbxl12      | F-box and leucine-rich repeat protein 12               | Ubiquitin-dependent protein catabolism      | +1.63       | 0.0587 |
| 145                | AW019421                                   | Dr.6291    | tnpo2       | Transportin 2 (importin 3, karyopherin beta 2b)        | Protein transport                           | -1.27       | 0.0614 |
| 164                | AI883718                                   |            | ATG7        | ATG7 autophagy related 7 homolog                       | Positive regulation of protein modification | +1.85       | 0.0625 |
| 175                | AI588515                                   | Dr.2974    | Rabac1      | Rab acceptor 1 (prenylated)                            | Protein binding; Golgi apparatus            | +1.34       | 0.0667 |
| 178                | BG737266                                   |            | ru2         | Ruby eye2-like protein                                 | Protein binding                             | +1.35       | 0.0667 |
| 200                | BG728947                                   | Dr.12053   | COG2        | Component of oligomeric golgi complex 2                | Protein transport                           | -1.18       | 0.0732 |
| 218                | BG737844                                   |            | mark1       | MAP/microtubule affinity-regulating kinase 3           | Protein kinase activity                     | +1.37       | 0.0789 |
| 259                | BG302807                                   | Dr.28615   | snx12       | Sorting nexin 12                                       | Protein transport                           | -1.26       | 0.0914 |

**Table 1 cont.**

| Rank                            | GenBank Accession<br><i>D. rerio</i> clone | UniGene ID | Gene Symbol | Putative Identification                                       | Function                                     | Fold Change | p      |
|---------------------------------|--------------------------------------------|------------|-------------|---------------------------------------------------------------|----------------------------------------------|-------------|--------|
| <i>Protein Processing cont.</i> |                                            |            |             |                                                               |                                              |             |        |
| 267                             | BG304171                                   | Dr.20155   | ss18        | Synovial sarcoma translocation, chromosome 18                 | Protein binding                              | +1.55       | 0.0936 |
| 279                             | AW058757                                   | Dr.20362   | cdc7        | Cell division cycle 7-related protein kinase                  | Protein serine/threonine kinase activity     | -1.17       | 0.0959 |
| 290                             | BI704278                                   | Dr.26555   | ctsla       | Cathepsin L, a                                                | Proteolysis and peptidolysis                 | +1.35       | 0.0965 |
| 301                             | BI980628                                   | Dr.16147   | osgepl1     | Novel glycoprotease; O-sialoglycoprotein endopeptidase-like 1 | Proteolysis and peptidolysis                 | +1.31       | 0.0968 |
| 323                             | BI882056                                   | Dr.6513    | cyhr1       | Cysteine and histidine rich 1                                 | Protein binding                              | +1.30       | 0.0998 |
| <i>Response to stress</i>       |                                            |            |             |                                                               |                                              |             |        |
| 3                               | AF082662                                   | Dr.28283   | hbbe1       | Hemoglobin beta embryonic-1                                   | Oxygen transport                             | +1.86       | 0.0131 |
| 54                              | AW344134                                   | Dr.9667    | dnajb11     | DnaJ (Hsp40) homolog, subfamily B, member 11                  | Heat shock protein binding; Protein folding  | +1.82       | 0.0392 |
| 60                              | BI673277                                   | Dr.2704    | stambp      | Associated molecule with the SH3 domain of STAM               | Anti-apoptosis; Ubiquitin cycle              | +1.27       | 0.0392 |
| 67                              | AA605696                                   | Dr.13845   | prdx6       | Peroxiredoxin 6                                               | Response to reactive oxygen species          | +1.53       | 0.0392 |
| 75                              | AI884178                                   | Dr.4306    | clpx        | Caseinolytic peptidase X homolog (E. coli)                    | Protein folding                              | +1.63       | 0.0414 |
| 128                             | AF082662                                   | Dr.28283   | hbbe1       | Hemoglobin beta embryonic-1                                   | Oxygen transport                             | +1.65       | 0.0586 |
| 224                             | AI964223                                   | Dr.2970    | apoea       | Apolipoprotein Ea                                             | Induction of apoptosis; Antioxidant activity | +1.31       | 0.0792 |
| 230                             | BM185394                                   | Dr.14011   | PFDN4       | Prefoldin subunit 4                                           | Protein folding                              | +1.29       | 0.0804 |
| 235                             | AI793830                                   | Dr.31082   | ptges3      | Prostaglandin E synthase 3 (cytosolic)                        | Hsp90 binding; Protein folding               | +1.34       | 0.0821 |
| 256                             | AI353083                                   | Dr.1450    | hbae3       | Hemoglobin alpha embryonic-3                                  | Oxygen transport                             | +1.90       | 0.0914 |
| 282                             | AF246176                                   | Dr.30472   |             | T-cell receptor alpha variable region                         | Immune Response; Receptor Activity           | +1.37       | 0.0959 |
| 296                             | BG884044                                   | Dr.4867    | HP          | Haptoglobin                                                   | Defense response; Hemoglobin binding         | +1.27       | 0.0965 |
| 298                             | BI890693                                   | Dr.13371   | hif1an      | Hypoxia-inducible factor 1, alpha subunit inhibitor           | Oxidoreductase; Regulation of transcription  | -1.23       | 0.0966 |
| <i>Signal Transduction</i>      |                                            |            |             |                                                               |                                              |             |        |
| 17                              | BM183950                                   | Dr.14422   | Cdon        | Cell adhesion molecule-related/down-regulated by oncogenes    | Smoothed signaling pathway                   | +1.46       | 0.0195 |
| 40                              | BM184012                                   | Dr.3319    | CALM3       | Calmodulin 3 (phosphorylase kinase, delta)                    | G-protein coupled receptor protein signaling | +1.23       | 0.0368 |
| 43                              | BG306148                                   | Dr.16542   | GRWD1       | Glutamate-rich WD repeat containing 1                         | Signal transduction                          | +1.85       | 0.0386 |
| 55                              | AF083382                                   | Dr.8112    | sema3ab     | Semaphorin 3ab                                                | Cell-cell signaling                          | +2.14       | 0.0392 |
| 66                              | AF116853                                   | Dr.8085    | frzb        | Frizzled-related protein                                      | Wnt receptor signaling pathway               | +1.54       | 0.0392 |
| 104                             | BF938356                                   | Dr.11228   | arl2bp      | ADP-ribosylation factor-like protein 2                        | Small GTPase regulator activity              | +1.58       | 0.0527 |
| 109                             | AW171604                                   | Dr.8015    | Cnksr2      | Connector enhancer of kinase suppressor of Ras 2              | Regulation of signal transduction            | -1.24       | 0.0583 |
| 129                             | AW128372                                   | Dr.7282    | IQGAP2      | IQ motif containing GTPase activating protein 2               | Small GTPase mediated signal transduction    | +1.54       | 0.0586 |
| 137                             | AW115682                                   | Dr.7257    | rasgef1b    | RasGEF domain family, member 1B                               | Small GTPase mediated signal transduction    | +1.29       | 0.0587 |
| 142                             | AW115765                                   | Dr.9538    | NCK2        | NCK adaptor protein 2                                         | Signal complex formation                     | -1.26       | 0.0609 |
| 163                             | AJ007742                                   | Dr.8054    | ptc2        | Patched2                                                      | Hedgehog receptor activity                   | +1.36       | 0.0625 |
| 168                             | BG307536                                   | Dr.9665    | rhoG        | Ras homolog gene family, member G                             | Signal Transduction                          | -1.33       | 0.0649 |
| 176                             | BI886464                                   | Dr.25497   | szl         | Sizzled                                                       | BMP signaling pathway                        | +1.69       | 0.0667 |
| 181                             | BM183274                                   | Dr.15125   |             | Small inducible cytokine subfamily A                          | Signal Transduction                          | +1.27       | 0.0667 |
| 185                             | U49405                                     |            | FZD4        | Frizzled homolog 4                                            | Frizzled signaling pathway                   | +1.29       | 0.0696 |
| 207                             | AW170891                                   | Dr.35466   | IGBP1       | Immunoglobulin (CD79A) binding protein 1                      | Signal transduction                          | +1.43       | 0.0752 |
| 222                             | BI878477                                   | Dr.10893   | sara2       | SAR1a gene homolog 2 ( <i>S. cerevisiae</i> )                 | Small GTPase mediated signal transduction;   | +1.31       | 0.0792 |
| 229                             | AF105152                                   | Dr.354     | rho         | Rhodopsin                                                     | Rhodopsin mediated signaling                 | +1.33       | 0.0800 |
| 246                             | AI477343                                   | Dr.2419    | tiaf1       | TGFB1-induced anti-apoptotic factor 1                         | I-kappaB kinase/NF-kappaB cascade            | -1.18       | 0.0899 |

Table 1 cont.

| Rank                             | GenBank Accession<br><i>D. rerio</i> clone | UniGene ID | Gene Symbol | Putative Identification                                     | Function                                    | Fold Change | p      |
|----------------------------------|--------------------------------------------|------------|-------------|-------------------------------------------------------------|---------------------------------------------|-------------|--------|
| <i>Signal Transduction cont.</i> |                                            |            |             |                                                             |                                             |             |        |
| 251                              | AW078288                                   | Dr.32732   | invs        | Inversin                                                    | Wnt receptor signaling pathway              | +1.24       | 0.0900 |
| 252                              | AI965042                                   | Dr.4874    | rab1a       | RAB1A, member RAS oncogene family                           | Two-component signal transduction system    | +1.55       | 0.0900 |
| 268                              | BM183955                                   | Dr.2109    | rap1a       | Ras-related protein RAP-1A                                  | Signal transduction                         | -1.27       | 0.0952 |
| 297                              | AW116767                                   | Dr.4451    | chp         | Calcium binding protein p22                                 | Calcium-mediated signaling; Transcytosis    | -1.23       | 0.0966 |
| 303                              | BE557009                                   | Dr.28754   | PRKAR1A     | cAMP-dependent protein kinase type I-alpha regulatory chain | Intracellular Signaling Cascade             | +1.20       | 0.0969 |
| 317                              | AW116392                                   | Dr.6091    | rhoQ        | Ras homolog gene family, member Q                           | Signal transduction                         | -1.19       | 0.0997 |
| <i>Transcription</i>             |                                            |            |             |                                                             |                                             |             |        |
| 7                                | BM156785                                   | Dr.15390   | FOXL1       | Forkhead box protein L1                                     | DNA-dependent regulation of transcription   | +1.81       | 0.0164 |
| 8                                | BI897147                                   | Dr.29850   | runx1       | Runt-related transcription factor 1                         | DNA-dependent regulation of transcription   | -1.79       | 0.0164 |
| 10                               | BM072263                                   | Dr.16724   | znf238      | BTB/POZ domain protein; Zinc finger protein 238             | DNA-dependent regulation of transcription   | +1.72       | 0.0166 |
| 13                               | U24225                                     | Dr.625     | Snail2      | Snail2                                                      | Transcription factor activity               | -1.37       | 0.0170 |
| 14                               | AW077156                                   | Dr.27746   | RBMS3       | RNA binding motif, single stranded interacting protein      | RNA binding                                 | +1.64       | 0.0170 |
| 20                               | BM026839                                   | Dr.9702    | rmb19       | RNA binding motif protein 19                                | Nucleic acid binding                        | +1.34       | 0.0218 |
| 22                               | BM024211                                   | Dr.6364    | ppp1r10     | Protein phosphatase 1, regulatory subunit 10                | Nucleic acid binding; Defense response      | +1.71       | 0.0227 |
| 29                               | BI887656                                   | Dr.356     | gata2       | GATA-binding protein 2                                      | Transcription factor activity; Heme binding | -1.30       | 0.0238 |
| 39                               | BM182314                                   | Dr.14269   | tmf1        | TATA element modulatory factor 1                            | DNA-dependent regulation of transcription   | +1.31       | 0.0365 |
| 44                               | X65060                                     |            | dlx3        | Distal-less homeobox 3                                      | DNA-dependent regulation of transcription   | +2.53       | 0.0386 |
| 52                               | U14592                                     | Dr.334     | otx2        | Orthodenticle homolog 2 (homeobox protein OTX2)             | DNA-dependent regulation of transcription   | +2.00       | 0.0392 |
| 62                               | AJ344448                                   | Dr.12575   | dcp1a       | Decapping enzyme                                            | Positive regulation of transcription        | +1.80       | 0.0392 |
| 64                               | BI889395                                   |            | CNOT6L      | CCR4-NOT transcription complex, subunit 6-like              | RNA processing and modification             | +1.57       | 0.0392 |
| 77                               | AW018998                                   | Dr.4008    | msl-1       | Male-specific lethal-1 protein                              | Chromatin binding; Dosage compensation      | -1.28       | 0.0418 |
| 85                               | BG303824                                   | Dr.14895   | ZNF135      | Zinc finger protein 135                                     | DNA-dependent regulation of transcription   | -1.27       | 0.0441 |
| 98                               | U84616                                     | Dr.2328    | elf2        | E74-like factor 2 (ets domain transcription factor)         | DNA-dependent regulation of transcription   | +1.66       | 0.0475 |
| 111                              | BI878117                                   | Dr.85      | nucb2a      | Nucleobindin 2a                                             | DNA binding; Calcium ion binding            | +1.39       | 0.0583 |
| 116                              | BI430221                                   | Dr.37036   | SLU7        | Step II splicing factor SLU7                                | mRNA splice site selection                  | +1.33       | 0.0586 |
| 133                              | AI601470                                   | Dr.35889   | hcfc1       | Host cell factor C1 (VP16-accessory protein)                | Regulation of transcription; Cell cycle     | +1.23       | 0.0587 |
| 141                              | AW170975                                   | Dr.36935   | ilf3        | Interleukin enhancer binding factor 3                       | DNA-dependent regulation of transcription   | +1.41       | 0.0594 |
| 155                              | BG306387                                   | Dr.11261   | A2bp1       | Ataxin 2-binding protein 1                                  | RNA binding                                 | +1.74       | 0.0614 |
| 156                              | BI891001                                   | Dr.29941   | top2a       | DNA topoisomerase II                                        | DNA unwinding during replication            | +1.35       | 0.0614 |
| 157                              | BI866527                                   | Dr.13962   | gins3       | GINS complex subunit 3                                      | DNA-dependent DNA replication               | -1.18       | 0.0614 |
| 158                              | AW305388                                   | Dr.10033   | lsm7        | LSM7 homolog, U6 small nuclear RNA associated               | Nuclear mRNA splicing, via spliceosome      | +1.39       | 0.0614 |
| 160                              | BM096095                                   | Dr.361     | seph        | Selenoprotein H                                             | DNA binding                                 | +1.41       | 0.0614 |
| 162                              | BI891601                                   | Dr.17679   | taf12       | TAF12 RNA polymerase II,                                    | DNA-dependent regulation of transcription   | +1.27       | 0.0618 |
| 169                              | AW116245                                   | Dr.14278   | znf131      | Zinc finger protein 131                                     | DNA-dependent regulation of transcription   | +1.32       | 0.0655 |
| 172                              | BM095242                                   | Dr.14888   | PRPF8       | U5 snRNP-specific protein (220kDa)                          | Nuclear mRNA splicing, via spliceosome      | -1.35       | 0.0667 |
| 179                              | BI877633                                   | Dr.19658   | Tip5        | TTF-I interacting peptide 5                                 | DNA-dependent regulation of transcription   | +2.48       | 0.0667 |
| 184                              | BI984001                                   | Dr.24310   | zcchc17     | Zinc finger, CCHC domain containing 17                      | Nucleic acid binding; Zinc ion binding      | +1.31       | 0.0696 |
| 190                              | AF071268                                   |            | hoxd9a      | Homeobox protein D9a                                        | DNA-dependent regulation of transcription   | +1.36       | 0.0698 |
| 191                              | AJ293862                                   |            | sall1a      | Danio rerio partial sall1a gene for putative spalt protein. | Nucleic acid binding; Zinc ion binding      | +1.25       | 0.0698 |
| 196                              | BI892074                                   | Dr.9145    | H3F3B       | H3 histone, family 3B                                       | DNA binding                                 | +1.26       | 0.0710 |

**Table 1 cont**

| Rank                       | GenBank Accession<br><i>D. rerio</i> clone | UniGene ID | Gene Symbol | Putative Identification                                     | Function                                  | Fold Change | p      |
|----------------------------|--------------------------------------------|------------|-------------|-------------------------------------------------------------|-------------------------------------------|-------------|--------|
| <i>Transcription cont.</i> |                                            |            |             |                                                             |                                           |             |        |
| 204                        | BI887415                                   | Dr.4758    |             | Proline-rich protein                                        | Nucleic acid binding                      | +1.35       | 0.0745 |
| 208                        | BM156999                                   | Dr.1992    | lmx1b       | LIM/homeobox protein LMX1B                                  | Transcription factor activity             | +1.29       | 0.0752 |
| 210                        | AI558282                                   | Dr.21124   | Sertad2     | SERTA domain containing 2                                   | DNA-dependent regulation of transcription | -1.23       | 0.0752 |
| 223                        | AW171228                                   | Dr.115     | tardbp1     | TAR DNA binding protein, like                               | DNA-dependent regulation of transcription | -1.29       | 0.0792 |
| 237                        | BI890768                                   |            | znf235      | Zinc finger protein 93 homolog                              | DNA-dependent regulation of transcription | +1.34       | 0.0821 |
| 245                        | BI878611                                   | Dr.8928    | cnot8       | CCR4-NOT transcription complex, subunit 8                   | DNA-dependent regulation of transcription | -1.31       | 0.0896 |
| 261                        | AI957820                                   | Dr.27315   | fen1        | Flap structure-specific endonuclease 1                      | DNA repair                                | +1.31       | 0.0914 |
| 262                        | AF168008                                   | Dr.618     | pea3        | ETS-domain transcription factor pea3                        | DNA-dependent regulation of transcription | +1.51       | 0.0914 |
| 266                        | AW420369                                   | Dr.27962   | scml2       | Sex comb on midleg-like 2                                   | DNA-dependent regulation of transcription | +1.47       | 0.0936 |
| 302                        | X65060                                     |            | dlx3        | Distal-less homeobox 3                                      | DNA-dependent regulation of transcription | +1.26       | 0.0969 |
| 308                        | AF071240                                   |            | hoxa11a     | Homeobox protein A11a                                       | DNA-dependent regulation of transcription | +1.24       | 0.0975 |
| <i>Translation</i>         |                                            |            |             |                                                             |                                           |             |        |
| 4                          | BM181896                                   | Dr.33915   | rps6        | 40S ribosomal protein S6                                    | Protein biosynthesis                      | +1.32       | 0.0131 |
| 32                         | BI889409                                   | Dr.14812   | mrpl36      | Mitochondrial ribosomal protein L36                         | Structural constituent of ribosome        | +1.43       | 0.0298 |
| 34                         | BM071666                                   | Dr.16980   | mrpl30      | Mitochondrial ribosomal protein L30                         | Structural constituent of ribosome        | +1.33       | 0.0302 |
| 97                         | AI667224                                   | Dr.34694   | EIF2C1      | Eukaryotic translation initiation factor 2C 1               | Protein biosynthesis                      | +1.60       | 0.0475 |
| 131                        | AI964245                                   | Dr.7888    | rrs1        | Ribosome biogenesis regulatory protein                      | Ribosome biogenesis and assembly          | +1.32       | 0.0587 |
| 276                        | AW232304                                   | Dr.4626    | eif2b2      | Eukaryotic translation initiation factor 2B, subunit 2 beta | Protein biosynthesis                      | +1.43       | 0.0959 |
| 283                        | AI545168                                   | Dr.48984   | DDX3        | DEAD-box protein 3                                          | Nucleic acid binding                      | +1.26       | 0.0959 |
| 299                        | AW117050                                   | Dr.2876    | EIF4B       | Eukaryotic translation initiation factor 4B                 | Protein biosynthesis                      | +1.35       | 0.0966 |
| <i>Transport</i>           |                                            |            |             |                                                             |                                           |             |        |
| 79                         | AW076983                                   | Dr.7965    | clcn4       | Chloride channel 4                                          | Chloride transport                        | +1.39       | 0.0418 |
| 171                        | AI793405                                   | Dr.4160    |             | Collagen alpha 1                                            | Phosphate transport; Skeletal development | +1.31       | 0.0667 |
| 233                        | AI667527                                   | Dr.5169    | abcb7       | ATP-binding cassette, sub-family B, member 7                | Transport; ATPase activity                | +1.27       | 0.0815 |
| <i>Other</i>               |                                            |            |             |                                                             |                                           |             |        |
| 30                         | BI350560                                   | Dr.34580   | CRTAC1      | Cartilage acidic protein 1                                  | Calcium ion binding                       | +1.51       | 0.0247 |
| 47                         | BM171804                                   | Dr.23461   | stc2        | Stanniocalcin 2                                             | Hormone activity                          | +1.52       | 0.0386 |
| 56                         | AW566602                                   | Dr.36369   | olfml3      | Olfactomedin-like 3                                         | Extracellular space                       | +1.62       | 0.0392 |
| 82                         | BG727594                                   | Dr.12251   | cmg2a       | Capillary morphogenesis protein 2A                          | Receptor activity; Protein binding        | +1.47       | 0.0428 |
| 96                         | AI877586                                   | Dr.36948   | NRN1        | Neuritin                                                    | Axonogenesis                              | +2.19       | 0.0474 |
| 101                        | BE605771                                   | Dr.9651    | Ifitm1      | Interferon induced transmembrane protein 1                  | Anterior/posterior pattern formation      | +1.42       | 0.0507 |
| 106                        | BI882405                                   | Dr.10079   | crybb3      | Crystallin, beta B3                                         | Structural constituent of eye lens        | +1.48       | 0.0558 |
| 206                        | BG985499                                   | Dr.1940    | Spna2       | Spectrin alpha 2                                            | Barbed-end actin filament capping         | +1.28       | 0.0752 |
| 225                        | BI673745                                   | Dr.14543   | rtdr1       | Rhabdoid tumor deletion region protein 1                    | Binding                                   | +2.03       | 0.0792 |
| 291                        | AW281815                                   | Dr.22797   | LAPTM5      | Lysosomal-associated protein transmembrane 5                | Lysosome                                  | +1.64       | 0.0965 |
